# Supplementary material
Source: Springer Nature journal article supplement (https://www.springermedizin.de/resource/supplementary/12960_2003_12_MOESM4_ESM.pdf/9569728)

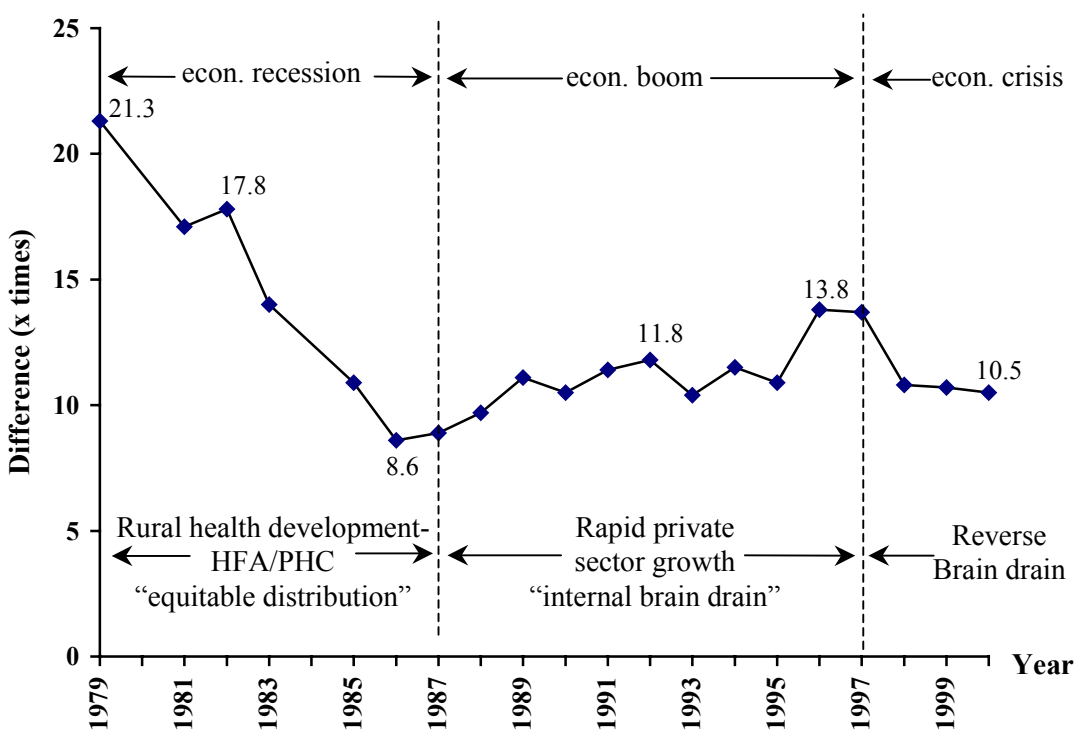

Source: Bureau of Health Policy and Plan, Ministry of Public Health

Supplement: MOESM4 [file 9569728]
